# Supplementary material
Source: PubMed Central journal article supplement (PMC1730197)

**Fig I: Model of Job Stress Among Truck Drivers and Driving Related Outcomes**

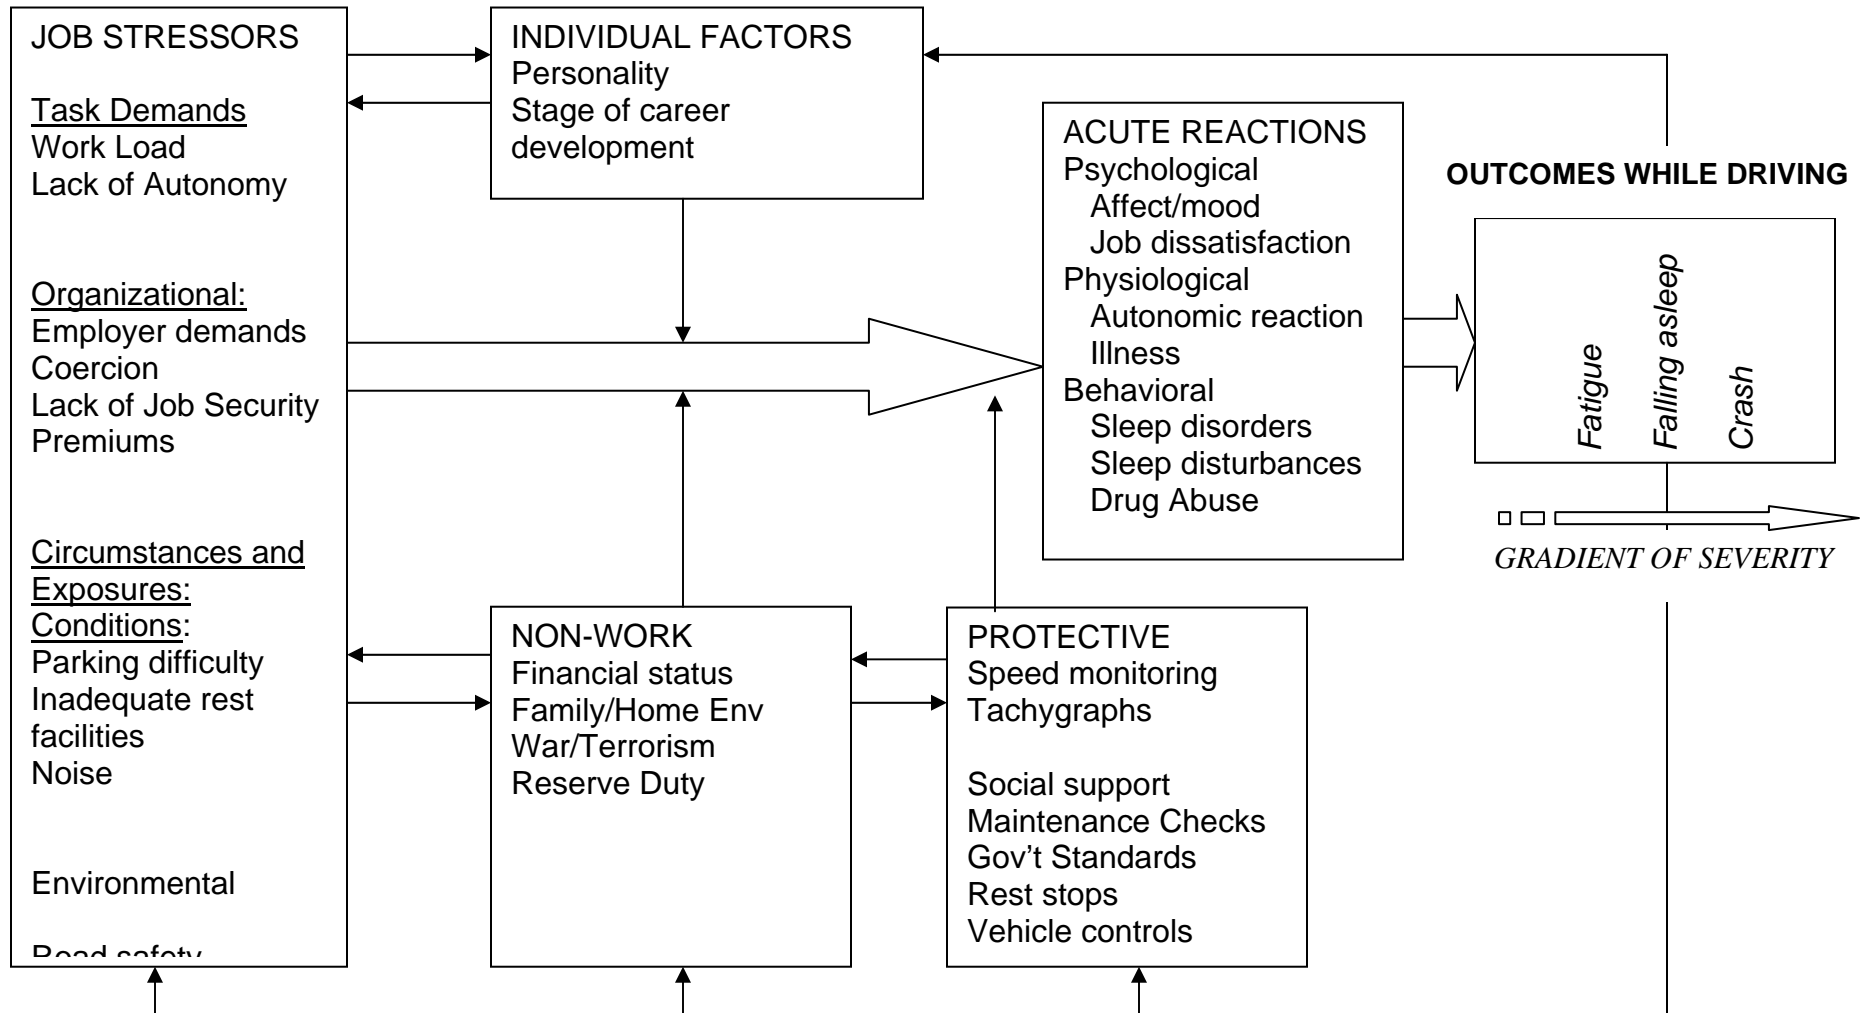

Supplement: injprev_11_2_110__1.pdf [file injprev_11_2_110__1.pdf]
